# Supplementary material for: Precrec: fast and accurate precision–recall and ROC curve calculations in R
Source: PubMed Central journal article supplement (PMC5408773; doi:10.1093/bioinformatics/btw570), 2016-09-01
Supplement: btw570_supp.pdf [file btw570_supp.pdf]

Supplementary data

# Precrec: fast and accurate precision-recall and ROC curve calculations in R

Takaya Saito and Marc Rehmsmeier

## Contents

### Supplementary methods

|                                            |       |
|--------------------------------------------|-------|
| 1. Tools for precision-recall calculations | ... 2 |
| 2. Validation of precision-recall curves   | ... 2 |
| 3. Benchmarking of processing time         | ... 3 |
| 4. Preparation for AUC analysis            | ... 4 |
| 5. Data preparation of imbalanced datasets | ... 4 |
| 6. Data preparation of tied scores         | ... 5 |
| 7. Test environment                        | ... 5 |

### Supplementary results

|                                                                    |       |
|--------------------------------------------------------------------|-------|
| 1. Precision-recall curve validations on C1, C2, and C3            | ... 6 |
| 2. Benchmarking of processing time on randomly generated test sets | ... 7 |
| 3. AUC analysis                                                    | ... 8 |
| 4. Imbalanced data analysis with large datasets                    | ... 9 |
| 5. Analysis on tied scores of a large dataset                      | ... 9 |

|                   |        |
|-------------------|--------|
| <b>References</b> | ... 10 |
|-------------------|--------|

# Supplementary methods

## 1. Tools for precision-recall calculations

We compared Precrec (Saito and Rehmsmeier, 2016b) with four other tools that can calculate precision-recall curves: ROCR (Sing *et al.*, 2005), AUCCalculator (Davis and Goadrich, 2006), PerfMeas (Valentini and Re, 2016), and PRROC (Grau *et al.*, 2015) (Table S1).

**Table S1.** Four tools for the comparisons with Precrec.

| Tool          | Version | Language | URL                                                                                                   |
|---------------|---------|----------|-------------------------------------------------------------------------------------------------------|
| ROCR          | 1.0-7   | R        | <a href="https://cran.r-project.org/package=ROCR">https://cran.r-project.org/package=ROCR</a>         |
| AUCCalculator | 0.2     | Java     | <a href="http://mark.goadrich.com/programs/AUC">http://mark.goadrich.com/programs/AUC</a>             |
| PerfMeas      | 1.2.1   | R        | <a href="https://cran.r-project.org/package=PerfMeas">https://cran.r-project.org/package=PerfMeas</a> |
| PRROC         | 1.1     | R        | <a href="https://cran.r-project.org/package=PRROC">https://cran.r-project.org/package=PRROC</a>       |

## 2. Validation of precision-recall curves

To validate whether the tools can compute correct precision-recall curves, we manually created three test datasets C1, C2, and C3 (Table S2).

**Table S2.** Test datasets C1, C2, and C3.

| Dataset | Row ID | Score | Label |
|---------|--------|-------|-------|
| C1      | 1      | 3     | 1     |
|         | 2      | 2     | 0     |
|         | 3      | 2     | 1     |
|         | 4      | 1     | 0     |
| C2      | 1      | 3     | 1     |
|         | 2      | 3     | 0     |
|         | 3      | 1     | 1     |
|         | 4      | 2     | 0     |
| C3      | 1      | 2     | 1     |
|         | 2      | 4     | 0     |
|         | 3      | 3     | 0     |
|         | 4      | 1     | 1     |

We then manually calculated precision-recall curves with interpolated precision values following the method proposed by Davis and Goadrich (Davis and Goadrich, 2006) (Tables S3-S5).

**Table S3.** Recall and precision values for C1.

| Ranks <sup>1</sup> | TP <sup>2</sup> | FP <sup>3</sup> | Recall | Precision      | Interpolated |
|--------------------|-----------------|-----------------|--------|----------------|--------------|
| 1                  | 0               | 0               | 0      | 1 <sup>†</sup> | No           |
|                    | 0.5             |                 | 0.25   | 1              | Yes          |
| 2                  | 1               | 0               | 0.5    | 1              | No           |
| 3                  | 1.5             | 0.5             | 0.75   | 0.75           | No           |
| 4                  | 2               | 1               | 1      | 0.67           | No           |
| 5                  | 2               | 2               | 1      | 0.5            | No           |

<sup>1</sup>Ranks are calculated from scores. <sup>2,3</sup>TP and FP are the number of true positives and false positives from the confusion matrix, respectively. <sup>†</sup>Value is estimated from the adjacent precision value since the original value is undefined.

**Table S4.** Recall and precision values for C2.

| Ranks <sup>1</sup> | TP <sup>2</sup> | FP <sup>3</sup> | Recall | Precision        | Interpolated |
|--------------------|-----------------|-----------------|--------|------------------|--------------|
| 1                  | 0               | 0               | 0      | 0.5 <sup>†</sup> | No           |
| 2                  | 0.5             | 0.5             | 0.25   | 0.5              | No           |
| 3                  | 1               | 1               | 0.5    | 0.5              | No           |
| 4                  | 1               | 2               | 0.5    | 0.33             | No           |
|                    | 1.5             |                 | 0.75   | 0.43             | Yes          |
| 5                  | 2               | 2               | 1      | 0.5              | No           |

<sup>1</sup>Ranks are calculated from scores. <sup>2,3</sup>TP and FP are the number of true positives and false positives from the confusion matrix, respectively. <sup>†</sup>Value is estimated from the adjacent precision value since the original value is undefined.

**Table S5.** Recall and precision values for C3.

| Ranks <sup>1</sup> | TP <sup>2</sup> | FP <sup>3</sup> | Recall | Precision      | Interpolated |
|--------------------|-----------------|-----------------|--------|----------------|--------------|
| 1                  | 0               | 0               | 0      | 0 <sup>†</sup> | No           |
| 2                  | 0               | 1               | 0      | 0              | No           |
| 3                  | 0               | 2               | 0      | 0              | No           |
|                    | 0.5             |                 | 0.25   | 0.2            | Yes          |
| 4                  | 1               | 2               | 0.5    | 0.33           | No           |
|                    | 1.5             |                 | 0.75   | 0.43           | Yes          |
| 5                  | 2               | 2               | 1      | 0.5            | No           |

<sup>1</sup>Ranks are calculated from scores. <sup>2,3</sup>TP and FP are the number of true positives and false positives from the confusion matrix, respectively. <sup>†</sup>Value is estimated from the adjacent precision value since the original value is undefined.

We tested the five tools on C1, C2, and C3 and evaluated whether they could produce correct recall and precision values. We used the prcbench tool (Saito and Rehmsmeier, 2016a) for testing five important aspects of precision-recall curves on C1, C2, and C3 (Table S6).

**Table S6.** Test categories and items for evaluating precision-recall curves.

| Category | Test item | Description                                                             | # tests                 |
|----------|-----------|-------------------------------------------------------------------------|-------------------------|
| SE       | fpoint    | Check the first point. It must be correctly estimated when undefined.   | 1                       |
|          | epoint    | Check the end point. It must be the point calculated as $T / (T + N)$ . | 1                       |
| lp       | int_pts   | Check the intermediate points.                                          | C1: 4<br>C2: 4<br>C3: 3 |
| Rg       | x_range   | Evaluate the range of recall values. The range must be [0, 1].          | 1                       |
|          | y_range   | Evaluate the range of precision values. The range must be [0, 1].       | 1                       |

### 3. Benchmarking of processing time

We tested the processing time of the five tools with randomly generated test datasets. We used the prcbench tool to create random scores with five different dataset sizes (Table S7).

**Table S7.** Datasets for benchmarking

| Dataset name | Data size | # of positives | # of negatives |
|--------------|-----------|----------------|----------------|
| 100          | 100       | 50             | 50             |
| 1k           | 1000      | 500            | 500            |
| 10k          | 10000     | 5000           | 5000           |
| 100k         | 100000    | 50000          | 50000          |
| 1m           | 1000000   | 500000         | 500000         |

Some tools calculate both ROC and precision-recall curves together with the corresponding AUC scores (Table S8). Moreover, the PRROC tool has an effective approach to calculate the area under the precision-recall curve. We were also interested in checking the process time with different parameters of PRROC. Hence, we tested PRROC with three different parameter configurations.

**Table S8.** Tool configurations for benchmarking

| Tool           | Curve <sup>1</sup> | AUC <sup>2</sup> | Parameters                          |
|----------------|--------------------|------------------|-------------------------------------|
| ROCR           | PRC                | -                | measure="prec", x.measure="rec"     |
| AUCCalculator  | PRC & ROC          | PRC & ROC        | fileType: list                      |
| PerfMeas       | PRC                | PRC              | comp.precision = TRUE               |
| PRROC          | PRC                | PRC              | curve = TRUE,<br>minStepSize = 0.01 |
| PRROC (step=1) | PRC                | PRC              | curve = TRUE,<br>minStepSize = 1    |
| PRROC (AUC)    | -                  | PRC              | curve = FALSE                       |
| Preprec        | PRC & ROC          | PRC & ROC        | (default)                           |

<sup>1,2</sup>PRC indicates precision-recall curves. <sup>1</sup>The type of curves the tool calculates. <sup>2</sup>The type of AUCs the tool calculates.

We used the prcbench tool to iterate all combinations of tools and test sets 10 times and calculated the average (mean) processing time for each tool and test set.

### 4. Preparation for AUC analysis

We tested four tools except for ROCR since it provide no AUC scores for precision-recall curves. We generated three different sizes of datasets, 50, 100, and 1000. We repeat the AUC calculation process 100 times and subsequently calculated the mean and the standard errors of the generated AUC scores. Datasets were randomly generated each iteration, and they were all balanced datasets.

### 5. Data preparation of imbalanced datasets

We used three different datasets to analyze the difference between linear and non-linear interpolation.

1. Balanced: positives 500 & negatives 500

2. Imbalanced 1: positives 100 & negatives 900
3. Imbalanced 1: positives 10 & negatives 990

We randomly generated the scores by sampling from the distributions of positives and negatives as  $N(3, 1)$  and  $N(1, 1)$ . We used Precrec to produce precision-recall plots.

## **6. Data preparation of tied scores**

We created a dataset with tied scores by randomly sampling 1000 positives and 1000 negatives as  $N(0.25, 0.5)$  and  $N(0, 0.5)$ . We replaced all values smaller than 0 with 0 and all values larger than 1 with 1. We used ROC and Precrec to compare between linear and non-linear curves.

## **7. Test environment**

We used our local machine for all tests and evaluations, a Linux workstation (CentOS 6.7) with Intel i7 4 cores (8 threads; 3.40GHz) and 16 GB RAM. We ran all tests with using a single core.

## Supplementary results

### 1. Precision-recall curve validations on C1, C2, and C3

Table S9 shows the summarized scores of precision-recall curve validations on C1, C2, and C3.

**Table S9.** Summarized validation scores of C1, C2, and C3

| Tool          | Score (C1) | Score (C2) | Score (C3) | Total score |
|---------------|------------|------------|------------|-------------|
| ROCR          | 5/8        | 5/8        | 4/7        | 14/23       |
| AUCCalculator | 6/8        | 6/8        | 5/7        | 17/23       |
| PerfMeas      | 5/8        | 5/8        | 5/7        | 15/23       |
| PRROC         | 7/8        | 8/8        | 7/7        | 22/23       |
| Precrec       | 8/8        | 8/8        | 7/7        | 23/23       |

In addition, Table S10 shows the detailed test results of precision-recall curve validations.

**Table S10.** Detailed test results of C1, C2, and C3

| Tool          | Test item | # of successes |    |    |
|---------------|-----------|----------------|----|----|
|               |           | C1             | C2 | C3 |
| ROCR          | x_range   | 1              | 1  | 1  |
|               | y_range   | 1              | 1  | 1  |
|               | fpoint    | 0              | 0  | 0  |
|               | int_pts   | 2              | 2  | 1  |
|               | epoint    | 1              | 1  | 1  |
| AUCCalculator | x_range   | 1              | 1  | 1  |
|               | y_range   | 1              | 1  | 1  |
|               | fpoint    | 0              | 0  | 0  |
|               | int_pts   | 4              | 3  | 2  |
|               | epoint    | 0              | 1  | 1  |
| PerfMeas      | x_range   | 1              | 1  | 1  |
|               | y_range   | 1              | 1  | 1  |
|               | fpoint    | 0              | 0  | 1  |
|               | int_pts   | 2              | 2  | 1  |
|               | epoint    | 1              | 1  | 1  |
| PRROC         | x_range   | 1              | 1  | 1  |
|               | y_range   | 0              | 1  | 1  |
|               | fpoint    | 1              | 1  | 1  |
|               | int_pts   | 4              | 4  | 3  |
|               | epoint    | 1              | 1  | 1  |
| Precrec       | x_range   | 1              | 1  | 1  |
|               | y_range   | 1              | 1  | 1  |
|               | fpoint    | 1              | 1  | 1  |
|               | int_pts   | 4              | 4  | 3  |
|               | epoint    | 1              | 1  | 1  |

## 2. Benchmarking of processing time on randomly generated test sets

Tables S11-15 show the detailed benchmark results of the 100, 1k, 10k, 100k, and 1m test sets.

**Table S11.** Benchmark result of the 100 dataset (in milliseconds)

| Tool           | min    | lq     | mean   | median | uq     | max    |
|----------------|--------|--------|--------|--------|--------|--------|
| ROCR           | 5.19   | 5.24   | 5.35   | 5.29   | 5.39   | 5.87   |
| AUCCalculator  | 99.18  | 102.33 | 104.9  | 104.88 | 105.76 | 118.21 |
| PerfMeas       | 0.12   | 0.13   | 0.2    | 0.14   | 0.2    | 0.61   |
| PRROC          | 302.26 | 304.43 | 348.34 | 322.74 | 396.91 | 419.03 |
| PRROC (step=1) | 6.61   | 6.97   | 7.88   | 7.90   | 8.82   | 9.08   |
| PRROC (AUC)    | 22.42  | 22.86  | 23.74  | 23.4   | 24.74  | 25.24  |
| Precrec        | 6.21   | 6.25   | 6.37   | 6.33   | 6.4    | 6.75   |

All values are rounded to two decimal places.

**Table S12.** Benchmark result of the 1k dataset (in milliseconds)

| Tool           | min   | lq    | mean  | median | uq    | max   |
|----------------|-------|-------|-------|--------|-------|-------|
| ROCR           | 6.47  | 6.56  | 6.75  | 6.75   | 6.82  | 7.15  |
| AUCCalculator  | 206   | 212   | 217   | 219    | 221   | 227   |
| PerfMeas       | 0.25  | 0.28  | 0.38  | 0.31   | 0.38  | 0.88  |
| PRROC          | 65359 | 75026 | 74485 | 75212  | 75965 | 76639 |
| PRROC (step=1) | 79.81 | 86.63 | 96.01 | 88.21  | 90.92 | 175   |
| PRROC (AUC)    | 226   | 226   | 236   | 227    | 228   | 313   |
| Precrec        | 6.07  | 6.24  | 6.75  | 6.47   | 7.11  | 8.66  |

Values greater than 100 are rounded to integer values. The remaining values are rounded to two decimal places.

**Table S13.** Benchmark result of the 10k dataset (in milliseconds)

| Tool           | min     | lq      | mean    | median  | uq      | max     |
|----------------|---------|---------|---------|---------|---------|---------|
| ROCR           | 17.69   | 18.17   | 19.44   | 19.58   | 19.65   | 21.71   |
| AUCCalculator  | 623     | 644     | 675     | 674     | 710     | 739     |
| PerfMeas       | 1.79    | 1.83    | 1.89    | 1.87    | 1.93    | 2.07    |
| PRROC          | 3173144 | 3523302 | 4965855 | 5451419 | 5798057 | 7701460 |
| PRROC (step=1) | 2683    | 2710    | 2811    | 2785    | 2896    | 3020    |
| PRROC (AUC)    | 2300    | 2302    | 2322    | 2305    | 2360    | 2370    |
| Precrec        | 8.88    | 8.96    | 9.54    | 9.00    | 10.04   | 11.35   |

Values greater than 100 are rounded to integer values. The remaining values are rounded to two decimal places.

**Table S14.** Benchmark result of the 100k dataset (in milliseconds)

| Tool           | min       | lq        | mean      | median    | uq        | max       |
|----------------|-----------|-----------|-----------|-----------|-----------|-----------|
| ROCR           | 165       | 168       | 176       | 170       | 172       | 239       |
| AUCCalculator  | 102401    | 10374     | 10410     | 10415     | 10478     | 10620     |
| PerfMeas       | 24.61     | 25.35     | 26.17     | 25.95     | 26.10     | 29.31     |
| PRROC          | 204392863 | 209714530 | 212283055 | 211126882 | 212550009 | 229970968 |
| PRROC (step=1) | 554701    | 709282    | 697908    | 712767    | 716595    | 719552    |
| PRROC (AUC)    | 23246     | 23340     | 23420     | 23400     | 23517     | 23681     |
| Precrec        | 35.36     | 36.59     | 38.7      | 39.64     | 40.55     | 41        |

Values greater than 100 are rounded to integer values. The remaining values are rounded to two decimal places.

**Table S15.** Benchmark result of the 1m dataset (in milliseconds)

| Tool                        | min     | lq      | mean    | median  | uq      | max     |
|-----------------------------|---------|---------|---------|---------|---------|---------|
| ROCR                        | 2510    | 2556    | 2603    | 2590    | 2625    | 2778    |
| AUCCalculator               | 1905023 | 1912508 | 1961509 | 1929234 | 1949094 | 2116694 |
| PerfMeas                    | 689     | 702     | 763     | 710     | 727     | 1154    |
| PRROC <sup>†</sup>          | -       | -       | -       | -       | -       | -       |
| PRROC (step=1) <sup>†</sup> | -       | -       | -       | -       | -       | -       |
| PRROC (AUC)                 | 243524  | 244681  | 247480  | 247656  | 249759  | 252026  |
| Precrec                     | 399     | 434     | 463     | 480     | 487     | 490     |

Values are rounded to integer values. <sup>†</sup>Tool was not tested by prcbench on this dataset.

### 3. AUC analysis

Table S16 shows the mean and standard error (SE) of the AUC scores calculated by the four tools. Both PRROC and Precrec used linear and non-linear (NL) methods to calculate the AUCs.

The AUC scores appear to be similar among all tools regardless of linear or non-linear methods. PerfMeas is slightly different from the others, but the differences are small.

**Table S16.** AUC scores

| Tool          | 50               |             | 100              |             | 1000             |             |
|---------------|------------------|-------------|------------------|-------------|------------------|-------------|
|               | mean             | SE          | mean             | SE          | mean             | SE          |
| AUCCalculator | 0.8425627        | 0.005343464 | 0.8410968        | 0.003812543 | 0.8322225        | 0.001325158 |
| PerfMeas      | <b>0.8025627</b> | 0.005343464 | <b>0.8210968</b> | 0.003812543 | <b>0.8302225</b> | 0.001325158 |
| PRROC         | 0.8426215        | 0.005338885 | 0.8410968        | 0.003812543 | 0.8322225        | 0.001325158 |
| Precrec       | 0.8426215        | 0.005338887 | 0.8410968        | 0.003812543 | 0.8322225        | 0.001325158 |
| PRROC (NL)    | 0.8425627        | 0.005343464 | 0.8411109        | 0.003811922 | 0.8322227        | 0.001325155 |
| Precrec (NL)  | 0.8425627        | 0.005343464 | 0.8411109        | 0.003811924 | 0.8322226        | 0.001325156 |



#### 4. Imbalanced data analysis with large datasets

Figure S1 shows precision-recall curves calculated from three different datasets. We used Precrec to calculate both linear and non-linear interpolations. The precision-recall curves of linear and non-linear are almost identical for the balanced dataset and the first imbalanced dataset with 100 positives and 900 negatives. Nonetheless, the difference is noticeable for the second imbalanced dataset with 10 positives and 990 negatives especially for small recall values between 0 and 0.25.



**Fig. S1.** Precision-recall curves on balanced and imbalanced datasets.

#### 5. Analysis on tied scores of a large dataset

Fig. S2 shows the result of Precrec and ROCR on a test dataset with 1000 positives and 1000 negatives. Fig. S2A indicates the range of scores is [0, 1], and the data set contains a number of 0s and 1s. Fig. S2B shows there are differences between linear (ROCR) and non-linear (Precrec) interpolation.



**Fig. S2.** Analysis of Precrec and ROCR on a dataset with tied scores.

## References

Davis, J. and Goadrich, M. (2006) The relationship between Precision-Recall and ROC curves. Proceedings of the 23rd international conference on Machine learning, 233-240.

Grau, J. *et al.* (2015) PRROC: computing and visualizing precision-recall and receiver operating characteristic curves in R. *Bioinformatics*, **31**, 2595-2597.

Saito, T. and Rehmsmeier, M. (2016a) prcbench: Testing Workbench for Precision-Recall Curves. <https://cran.r-project.org/package=prcbench>.

Saito, T. and Rehmsmeier, M. (2016b) precrec: Calculate Accurate Precision-Recall and Receiver Operator Characteristics Curves. <https://cran.r-project.org/package=precrec>.

Sing, T. *et al.* (2005) ROCR: visualizing classifier performance in R. *Bioinformatics*, **21**, 3940-3941.

Valentini, G. and Re, M. (2016) PerfMeas: Performance Measures for ranking and classification tasks. <https://cran.r-project.org/package=PerfMeas>.
